# Supplementary material for: Identification of a novel monocyclic carotenoid and prediction of its biosynthetic genes in Algoriphagus sp. oki45
Source: Springer Nature journal article supplement (doi:10.1007/s00253-023-12995-2), 2024-01-11
Supplement: MOESM1 [file 253_2023_12995_MOESM1_ESM.pdf]

## **Supplementary Information**

### **Applied Microbiology and Biotechnology**

#### **Identification of a novel monocyclic carotenoid and prediction of its biosynthetic genes in *Algoriphagus* sp. oki45**

Naoki Takatani<sup>1</sup>, Takashi Maoka<sup>2</sup>, Tomoo Sawabe<sup>1</sup>, Fumiaki Beppu<sup>1</sup>, Masashi Hosokawa<sup>1,\*</sup>

<sup>1</sup> Faculty of Fisheries Sciences, Hokkaido University, 3-1-1 Minato, Hakodate, Hokkaido 041-8611, Japan

<sup>2</sup> Research Institute for Production Development, 15 Shimogamo-morimoto-cho, Sakyo-ku, Kyoto 606-0805, Japan

\*Corresponding author

E-mail: [hoso@fish.hokudai.ac.jp](mailto:hoso@fish.hokudai.ac.jp)

Tel & Fax: +81-138-40-5530

## Contents

### Supplementary Figures

|                                                                                                                                                             |    |
|-------------------------------------------------------------------------------------------------------------------------------------------------------------|----|
| <b>Fig. S1</b> Comparison of HPLC chromatogram and absorption spectrum between lycopene standard and Peak I in total lipids extracted from the strain oki45 | 4  |
| <b>Fig. S2</b> TOF MS/MS spectrum of purified Peak II                                                                                                       | 5  |
| <b>Fig. S3</b> <sup>1</sup> H-NMR of purified Peak II                                                                                                       | 6  |
| <b>Fig. S4</b> COSY spectrum of purified Peak II                                                                                                            | 7  |
| <b>Fig. S5</b> NOESY spectrum of purified Peak II                                                                                                           | 8  |
| <b>Fig. S6</b> CD spectrum of purified Peak II                                                                                                              | 9  |
| <b>Fig. S7</b> TOF MS/MS spectrum of purified Peak III                                                                                                      | 10 |
| <b>Fig. S8</b> <sup>1</sup> H-NMR of purified Peak III                                                                                                      | 11 |
| <b>Fig. S9</b> <sup>13</sup> C-NMR of purified Peak III                                                                                                     | 12 |
| <b>Fig. S10</b> COSY spectrum of purified Peak III                                                                                                          | 13 |
| <b>Fig. S11</b> NOESY spectrum of purified Peak III                                                                                                         | 14 |
| <b>Fig. S12</b> HSQC spectrum of purified Peak III                                                                                                          | 15 |
| <b>Fig. S13</b> Enlarged view of HSQC spectrum in Figure S12                                                                                                | 16 |
| <b>Fig. S14</b> HMBC spectrum of purified Peak III                                                                                                          | 17 |
| <b>Fig. S15</b> Enlarged view 1 of HMBC spectrum in Figure S14                                                                                              | 18 |
| <b>Fig. S16</b> Enlarged view 2 of HMBC spectrum in Figure S14                                                                                              | 19 |
| <b>Fig. S17</b> CD spectrum of purified Peak III                                                                                                            | 20 |
| <b>Fig. S18</b> TLC analysis of <i>Algoriphagus confluentis</i> NBRC 111222 <sup>T</sup> and <i>Algoriphagus taiwanensis</i> JCM 19755 <sup>T</sup>         | 21 |
| <b>Fig. S19</b> Venn-Diagram comparing the genomic content of three <i>Algoriphagus</i>                                                                     | 22 |

|                                                                                                                                                                             |    |
|-----------------------------------------------------------------------------------------------------------------------------------------------------------------------------|----|
| <b>Fig. S20</b> Putative carotenoid biosynthetic genes in strain oki45, <i>A. confluentis</i> NBRC 111222 <sup>T</sup> , <i>A. taiwanensis</i> JCM 19755 <sup>T</sup> ..... | 23 |
| <b>Fig. S21</b> Comparison of ANI between 10 <i>Algoriphagus</i> .....                                                                                                      | 24 |
| <b>Fig. S22</b> 1D NOE spectrum of purified Peak III (1) .....                                                                                                              | 25 |
| <b>Fig. S23</b> 1D NOE spectrum of purified Peak III (2) .....                                                                                                              | 26 |

## Supplementary Table

|                                                                                                                                                                                |    |
|--------------------------------------------------------------------------------------------------------------------------------------------------------------------------------|----|
| <b>Table S1</b> Calculation results using GGDC for three strains of oki45, <i>A. confluentis</i> NBRC 111222 <sup>T</sup> , <i>A. taiwanensis</i> JCM 19755 <sup>T</sup> ..... | 27 |
|--------------------------------------------------------------------------------------------------------------------------------------------------------------------------------|----|

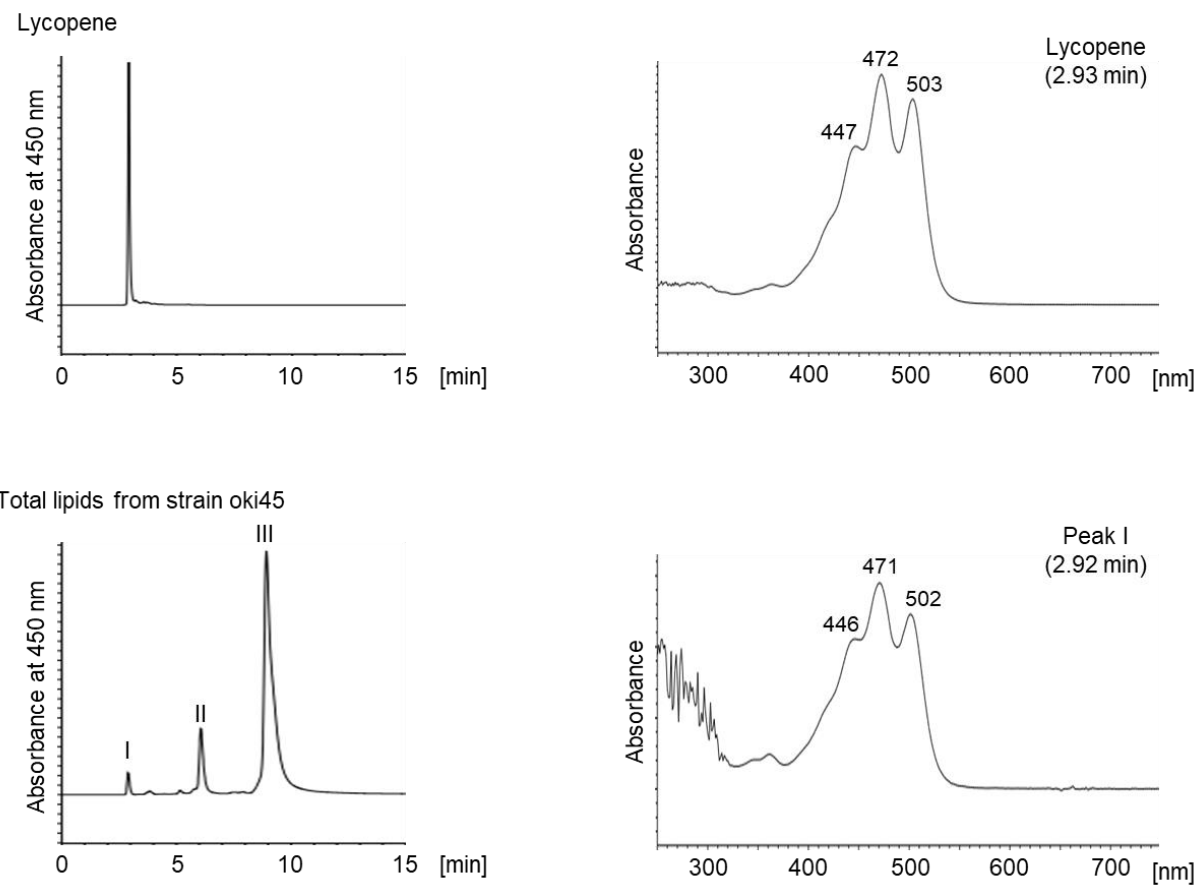

**Fig. S1** Comparison of HPLC chromatogram and absorption spectrum between lycopene standard (upper panels) and Peak I in total lipids extracted from the strain oki45 (lower panels).

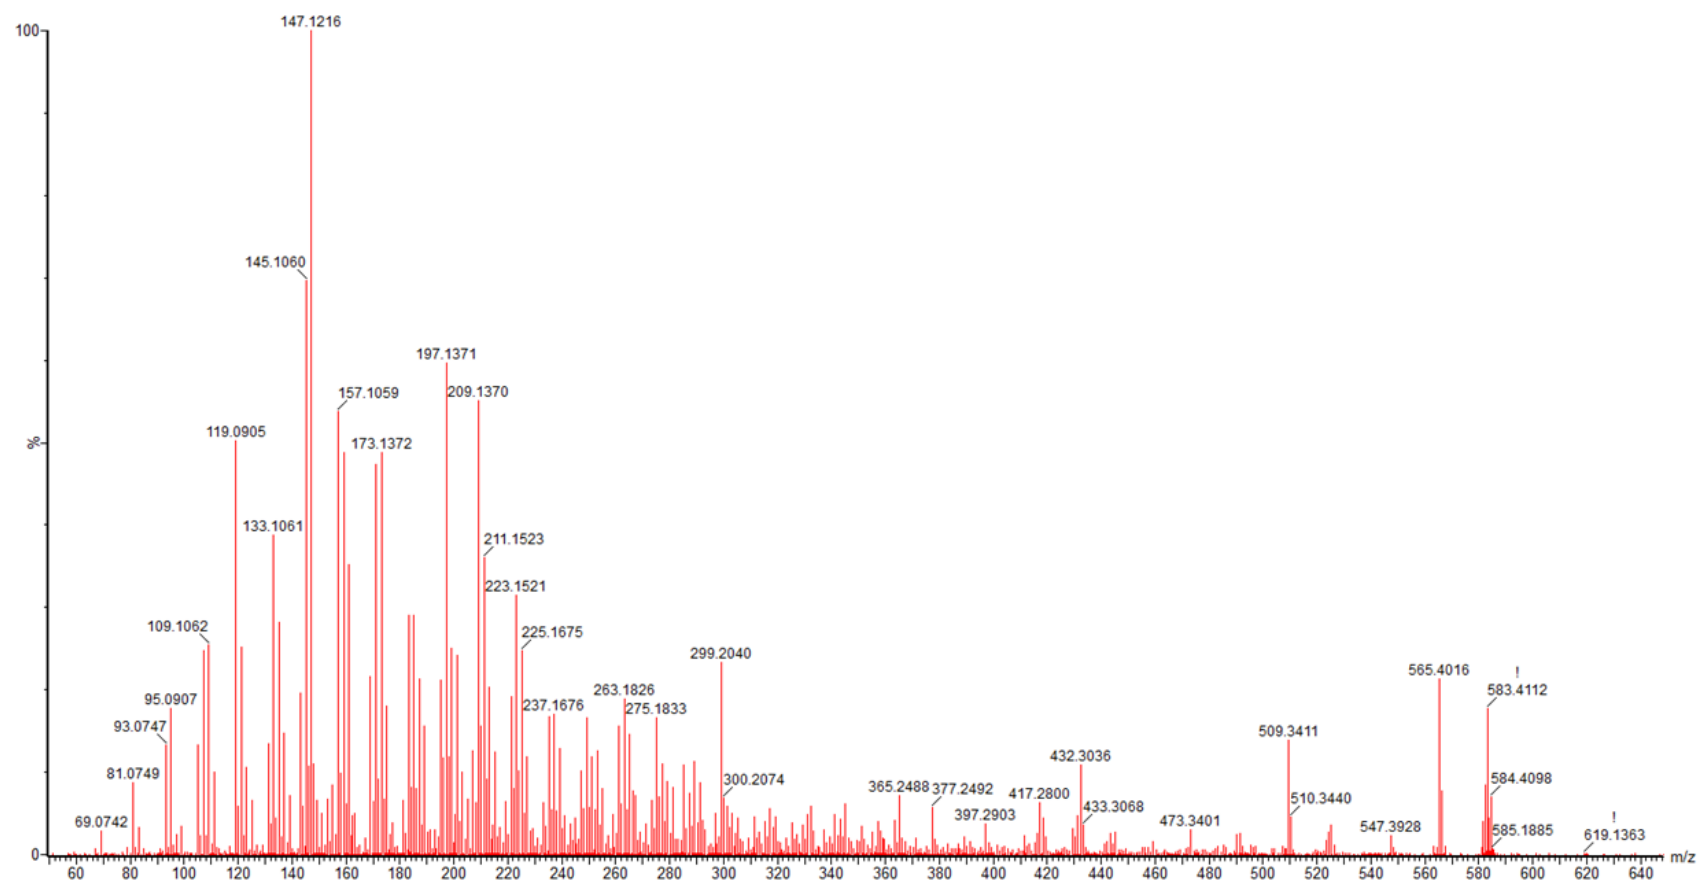

**Fig. S2** TOF MS/MS spectrum of purified Peak II

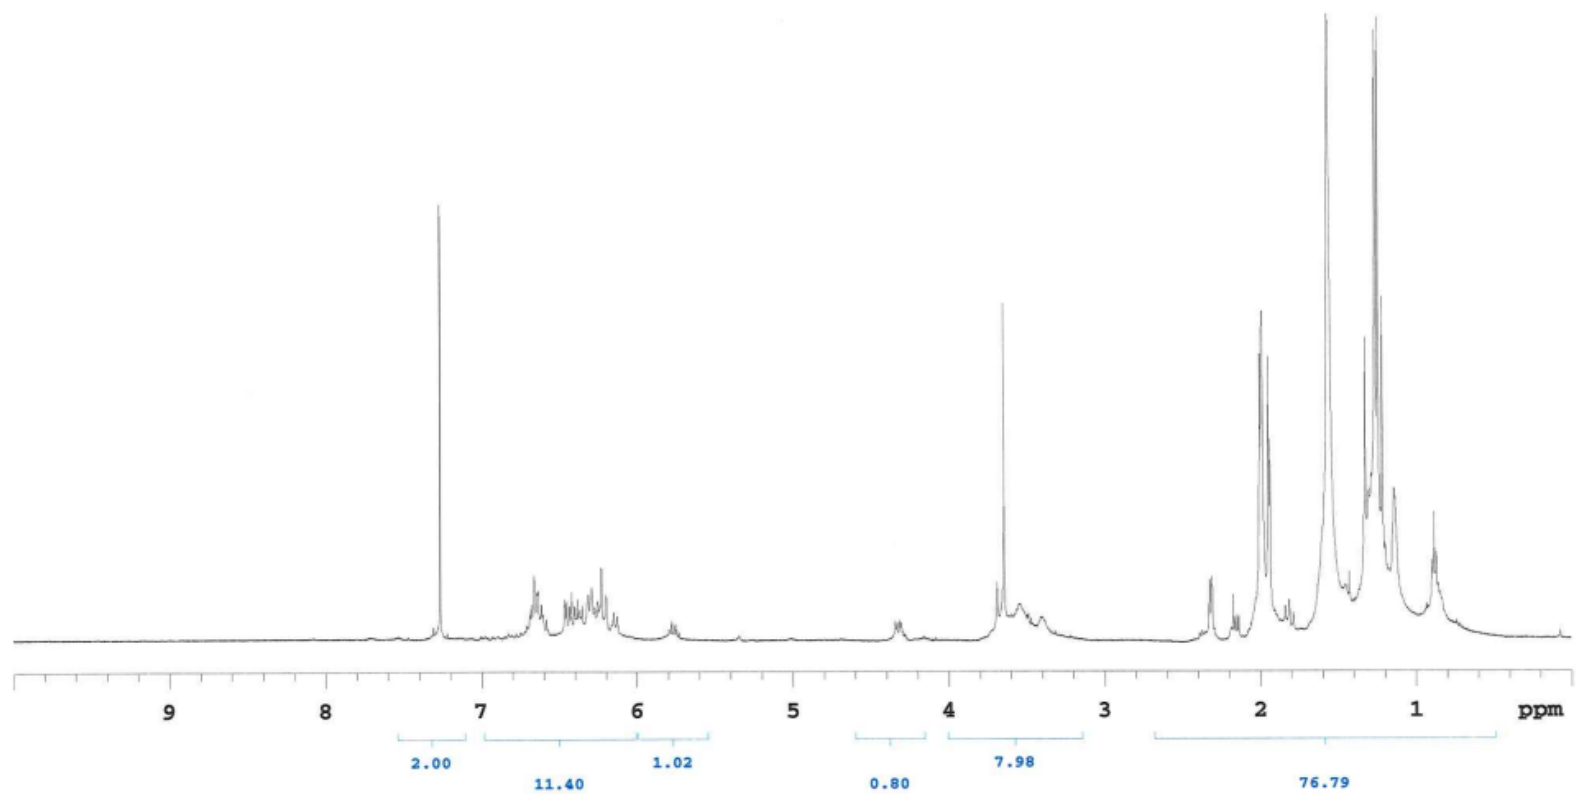

**Fig. S3**  $^1\text{H}$ -NMR of purified Peak II

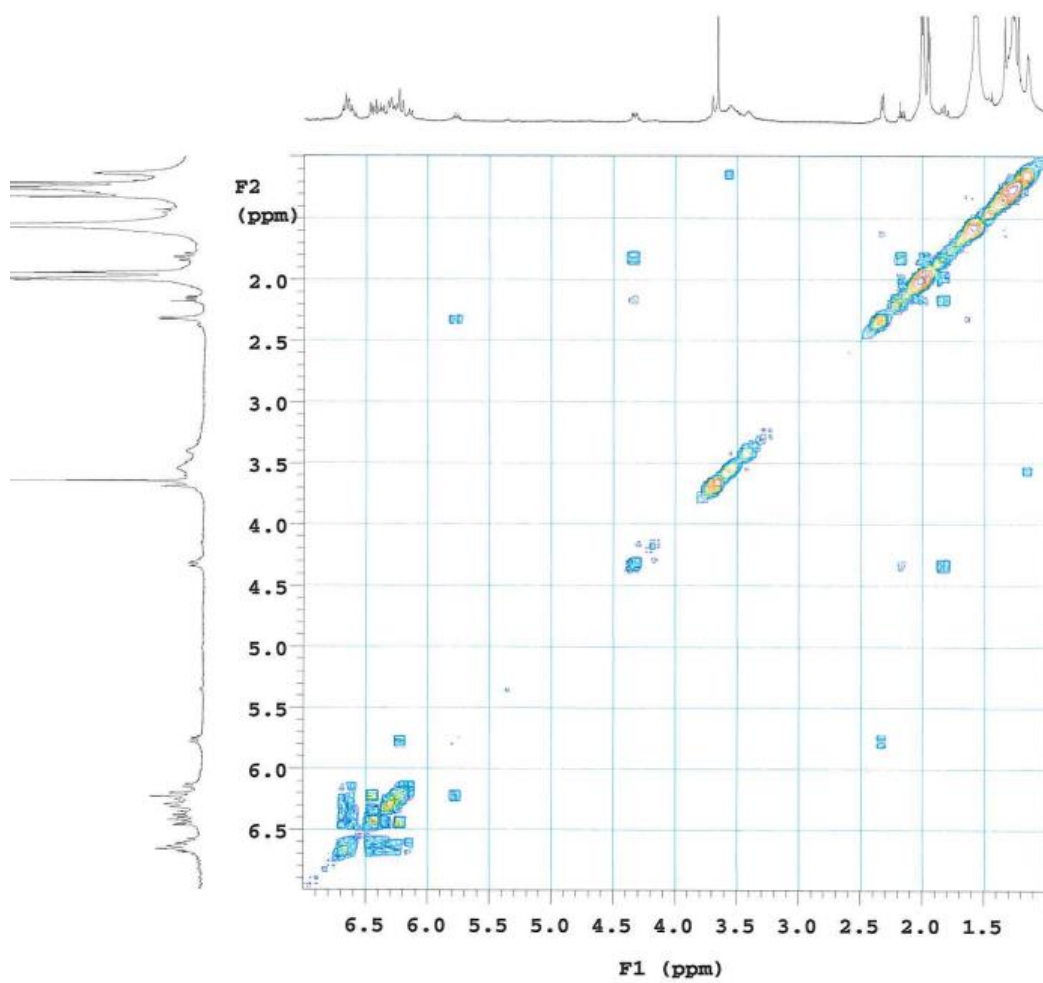

**Fig. S4** COSY spectrum of purified Peak II

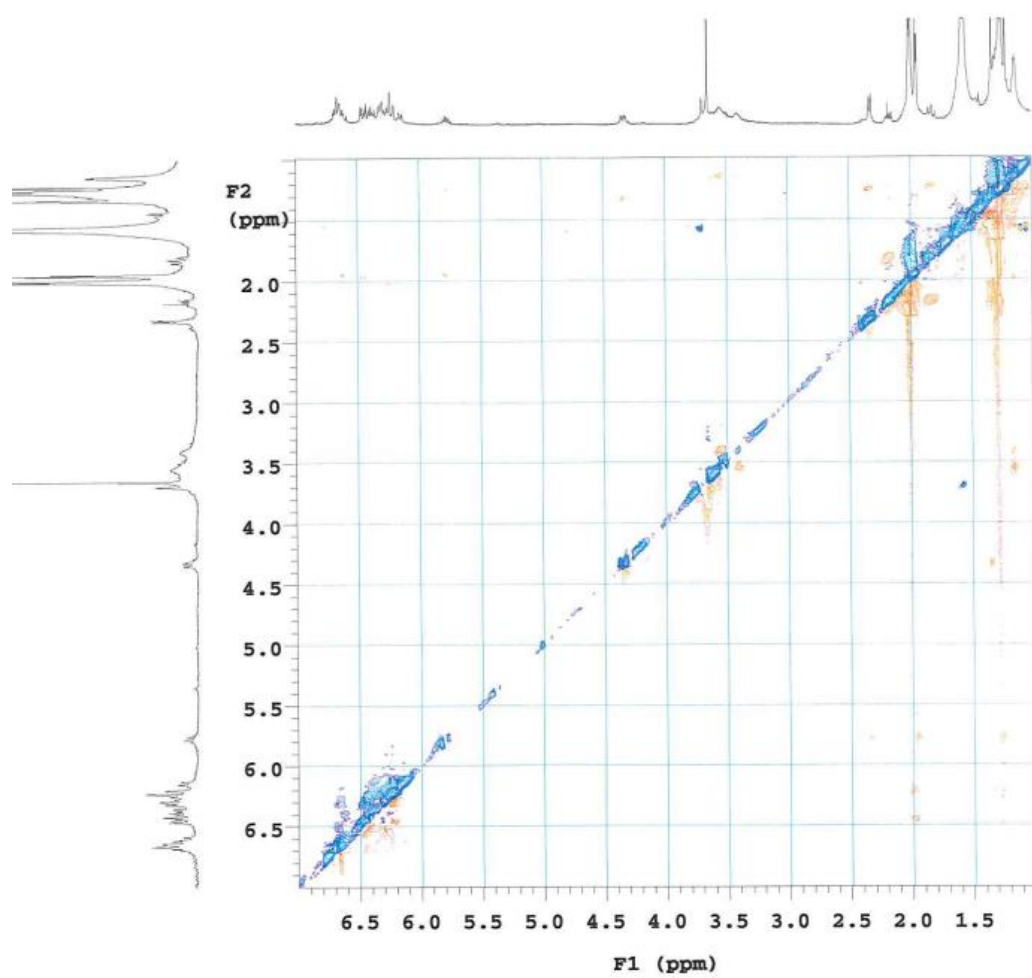

**Fig. S5** NOESY spectrum of purified Peak II



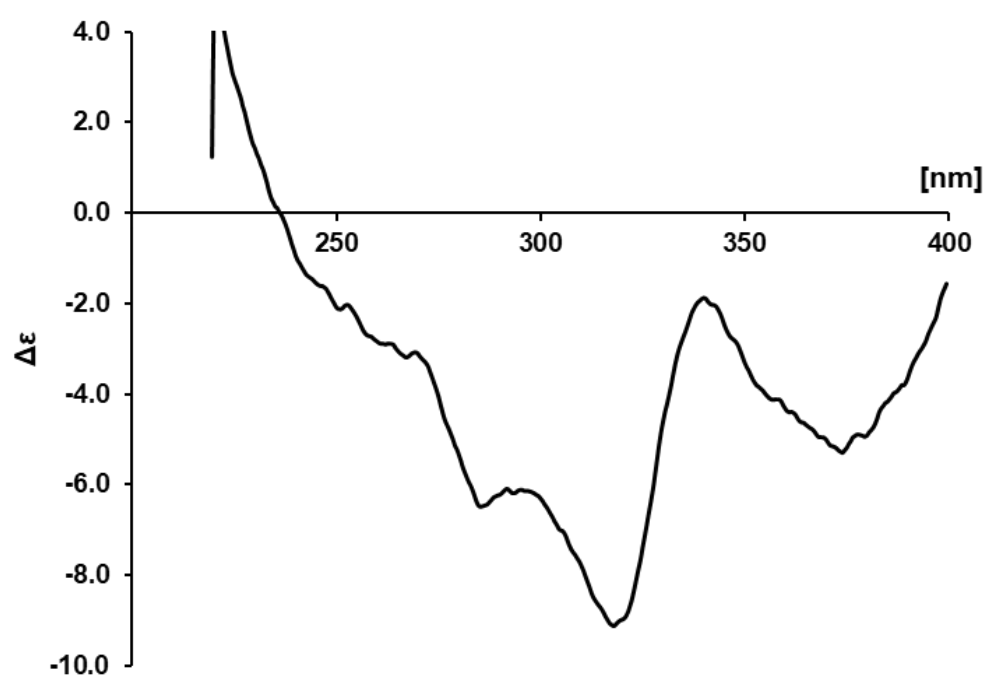

**Fig. S6** CD spectrum of purified Peak II

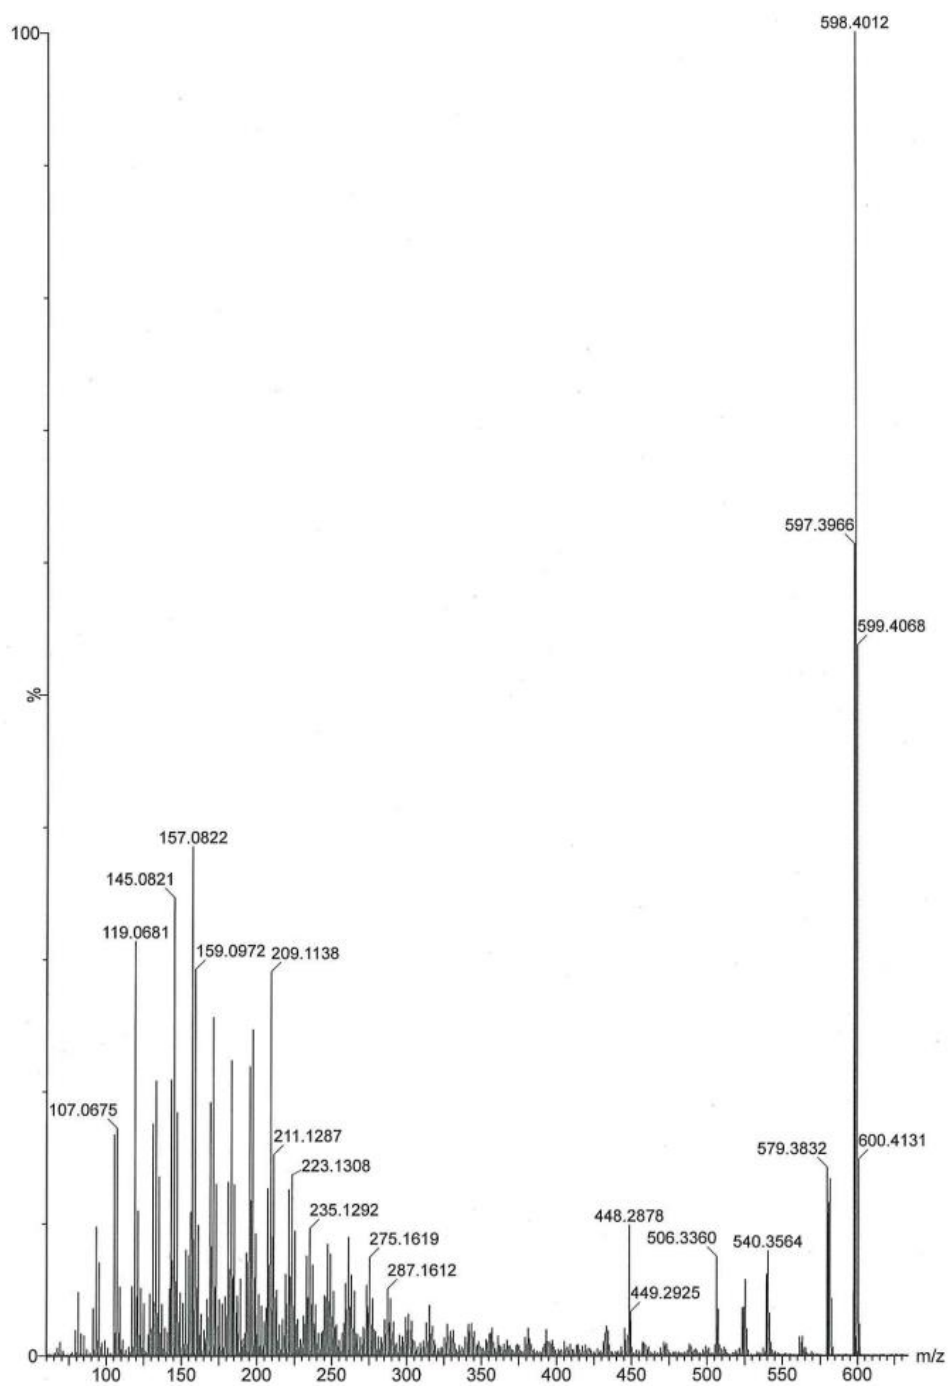

**Fig. S7** TOF MS/MS spectrum of purified Peak III

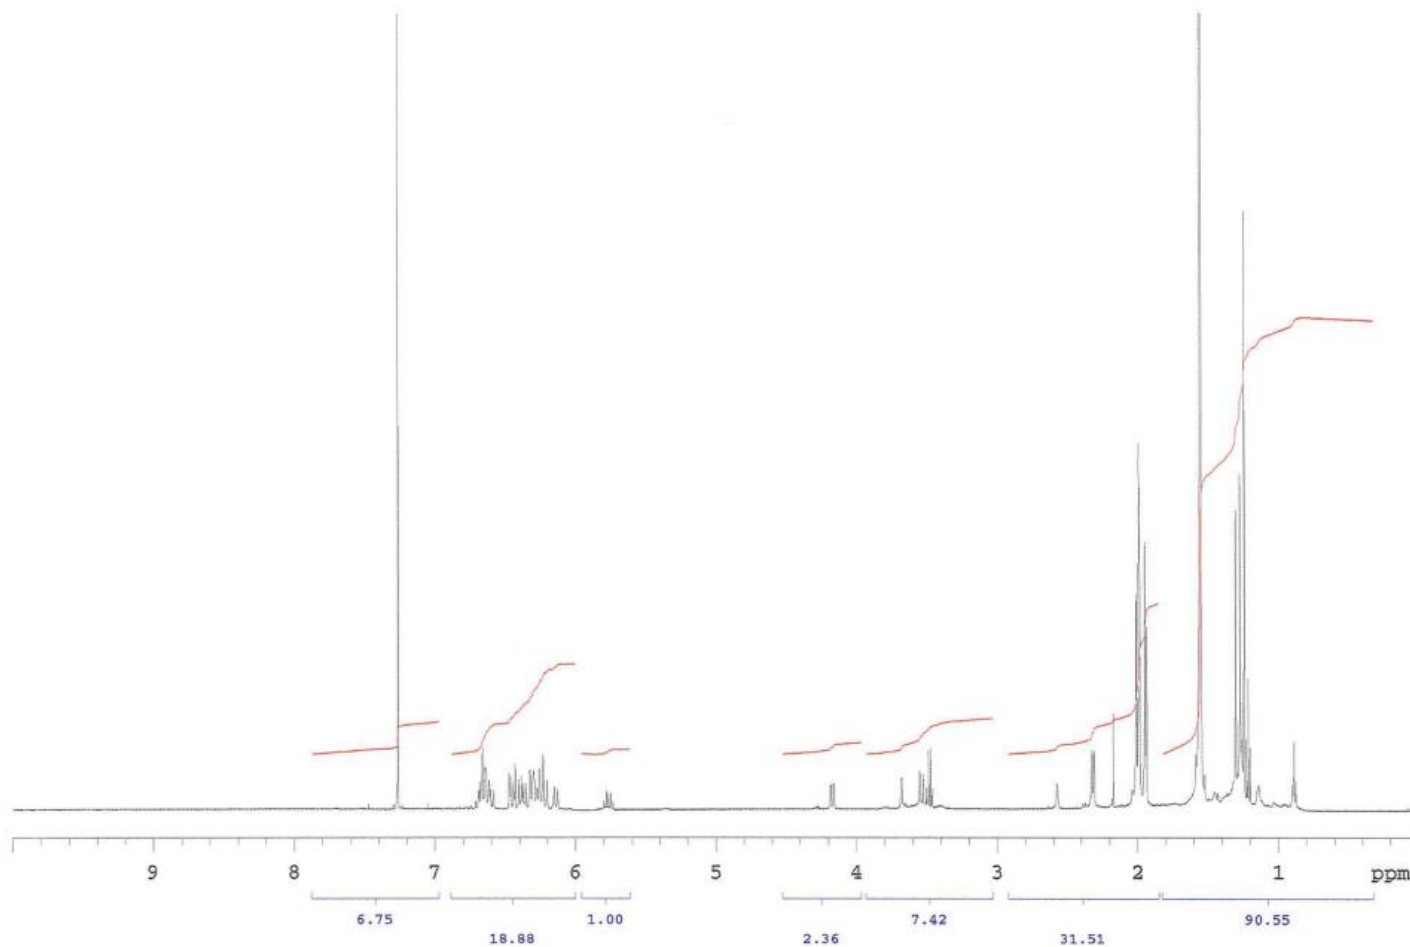

**Fig. S8**  $^1\text{H}$ -NMR of purified Peak III

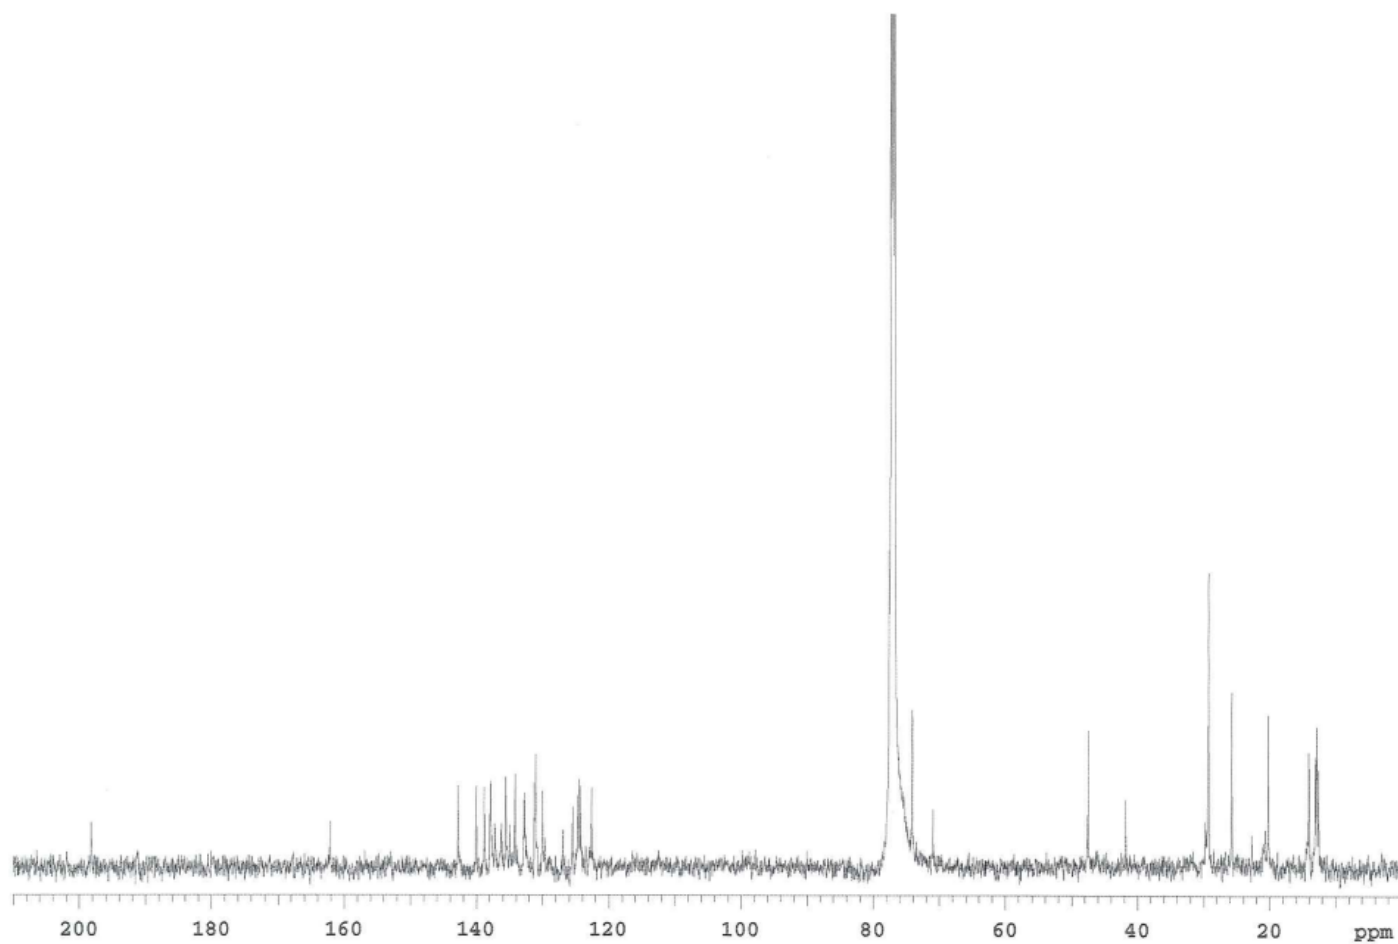

**Fig. S9**  $^{13}\text{C}$ -NMR of purified Peak III

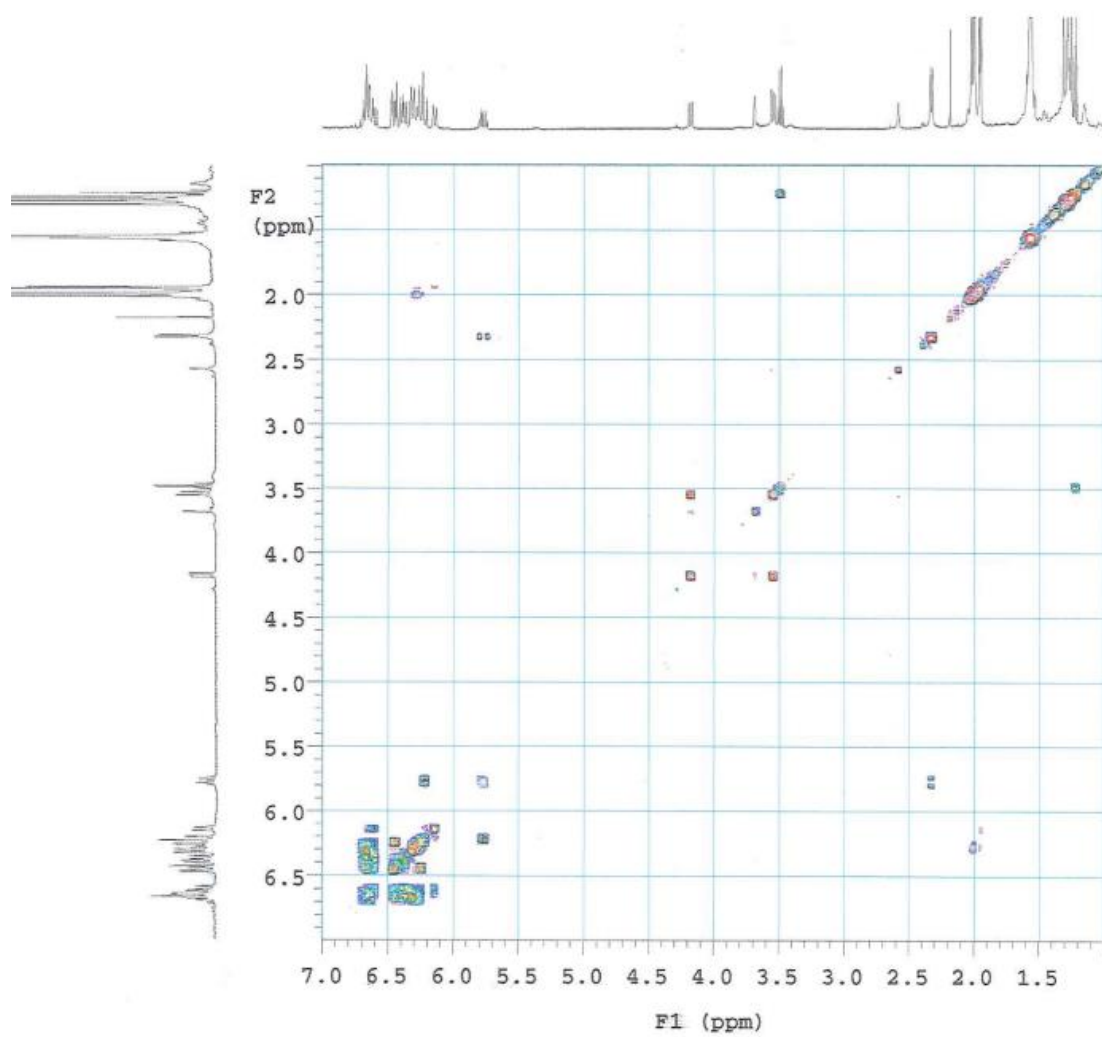

**Fig. S10** COSY spectrum of purified Peak III

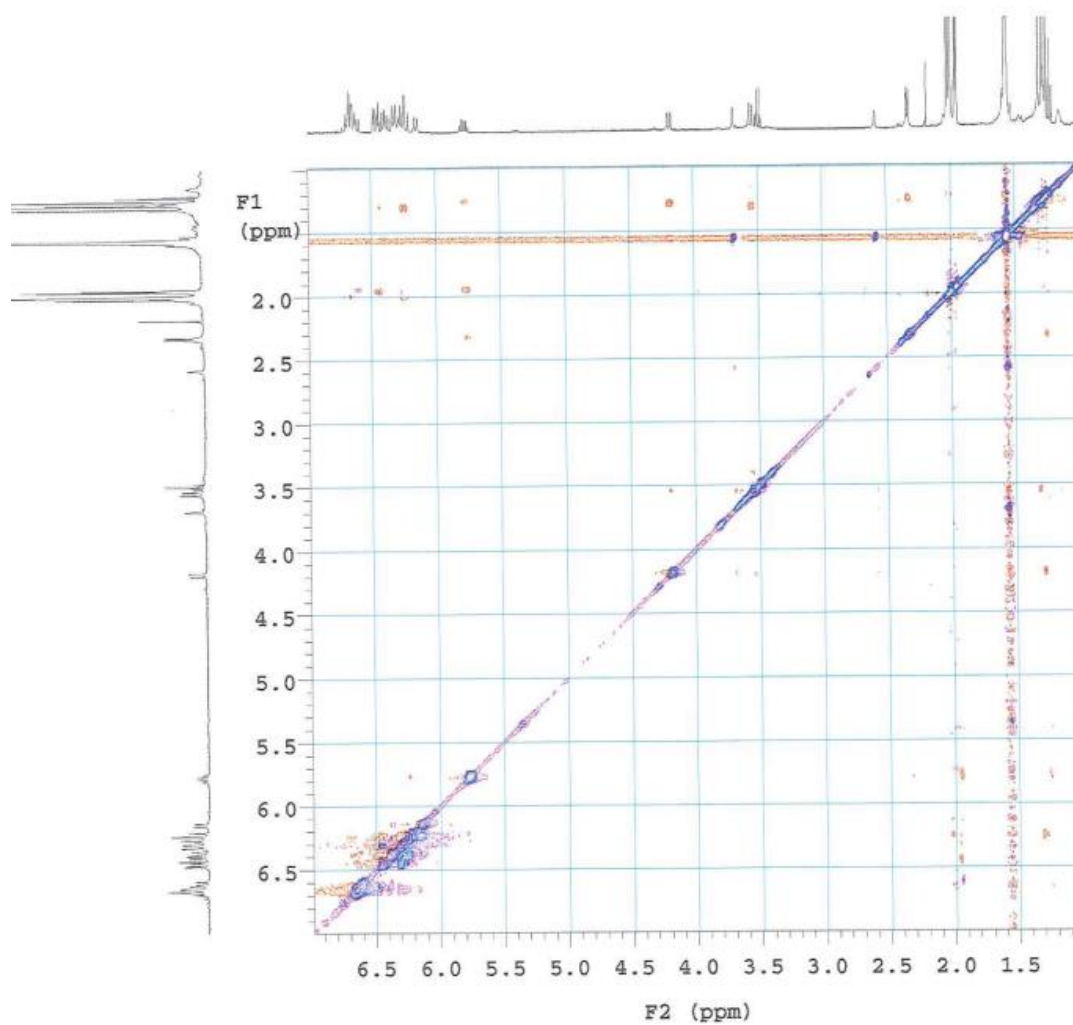

**Fig. S11** NOESY spectrum of purified Peak III

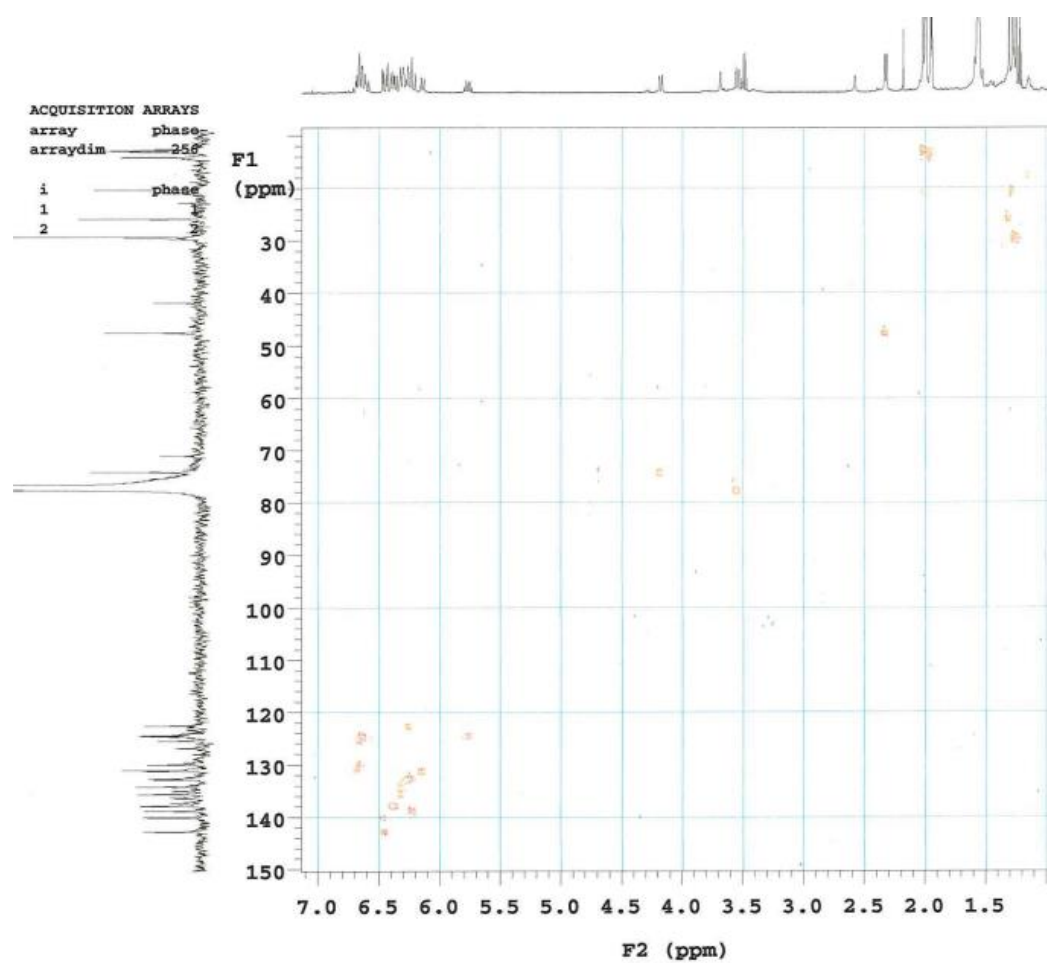

**Fig. S12** HSQC spectrum of purified Peak III

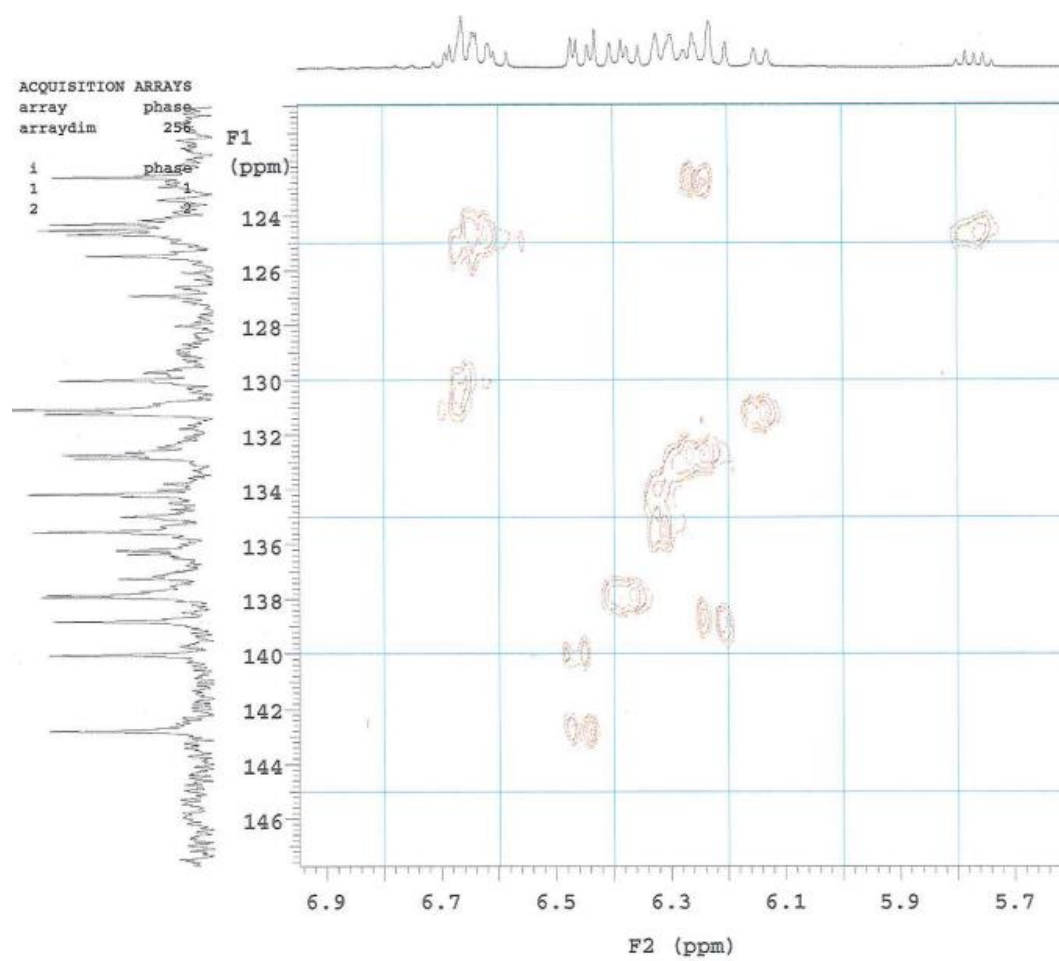

**Fig. S13** Enlarged view of HSQC spectrum in Figure S12



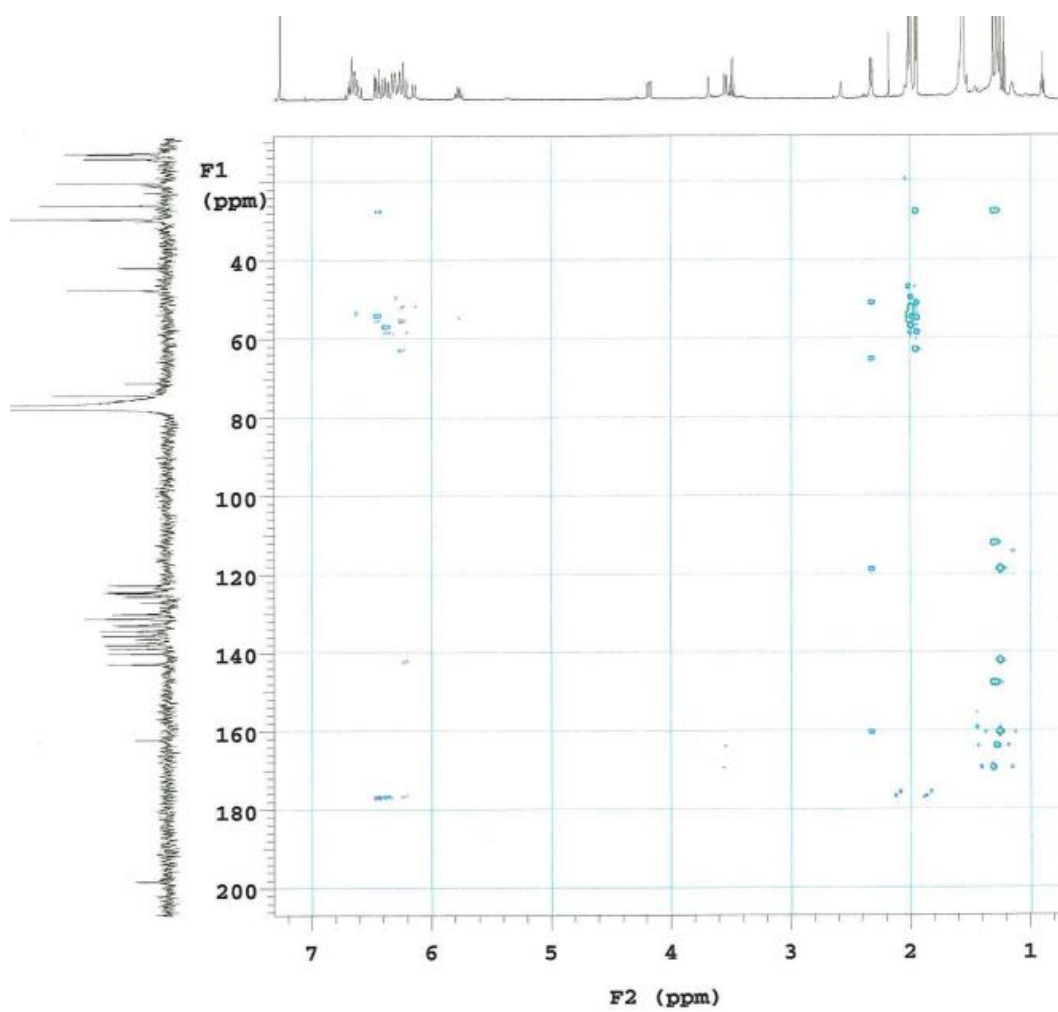

**Fig. S14** HMBC spectrum of purified Peak III

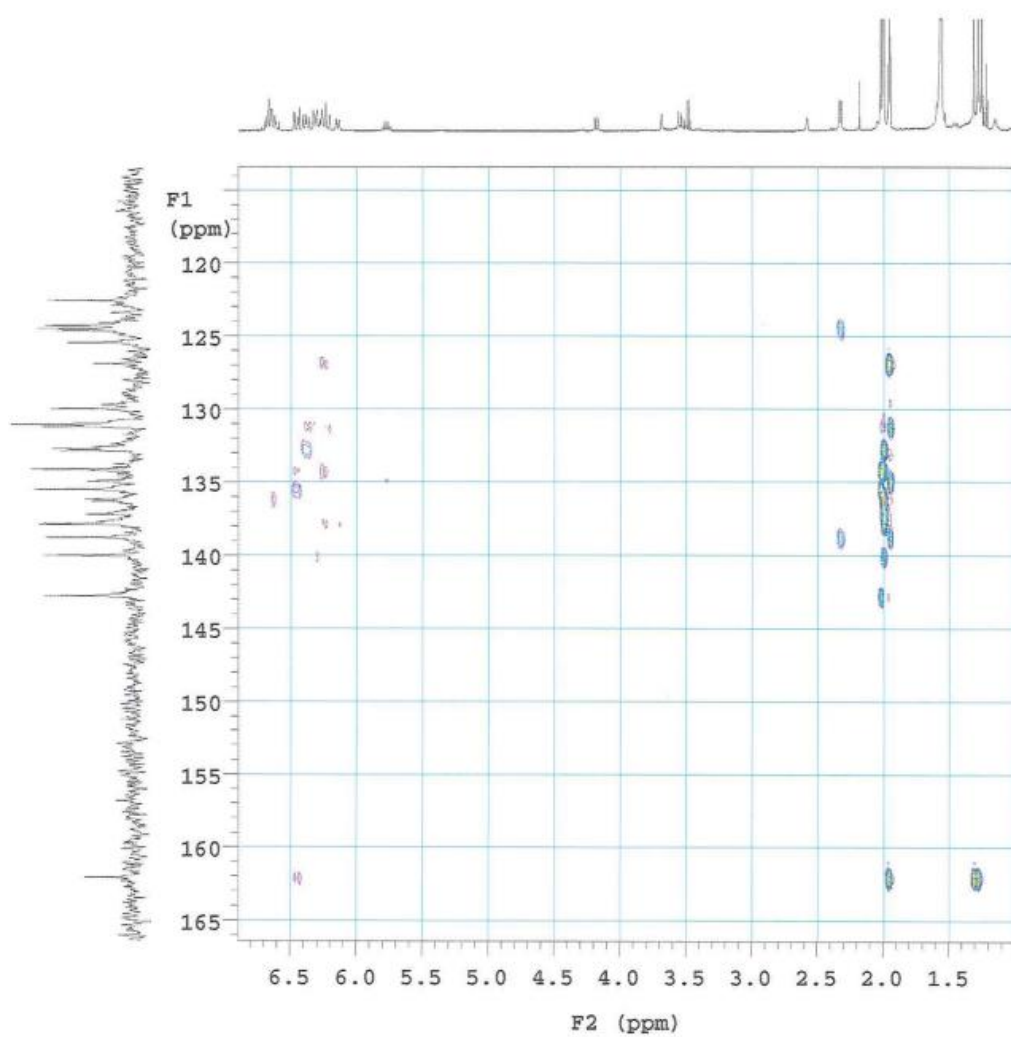

**Fig. S15** Enlarged view 1 of HMBC spectrum in Figure S14

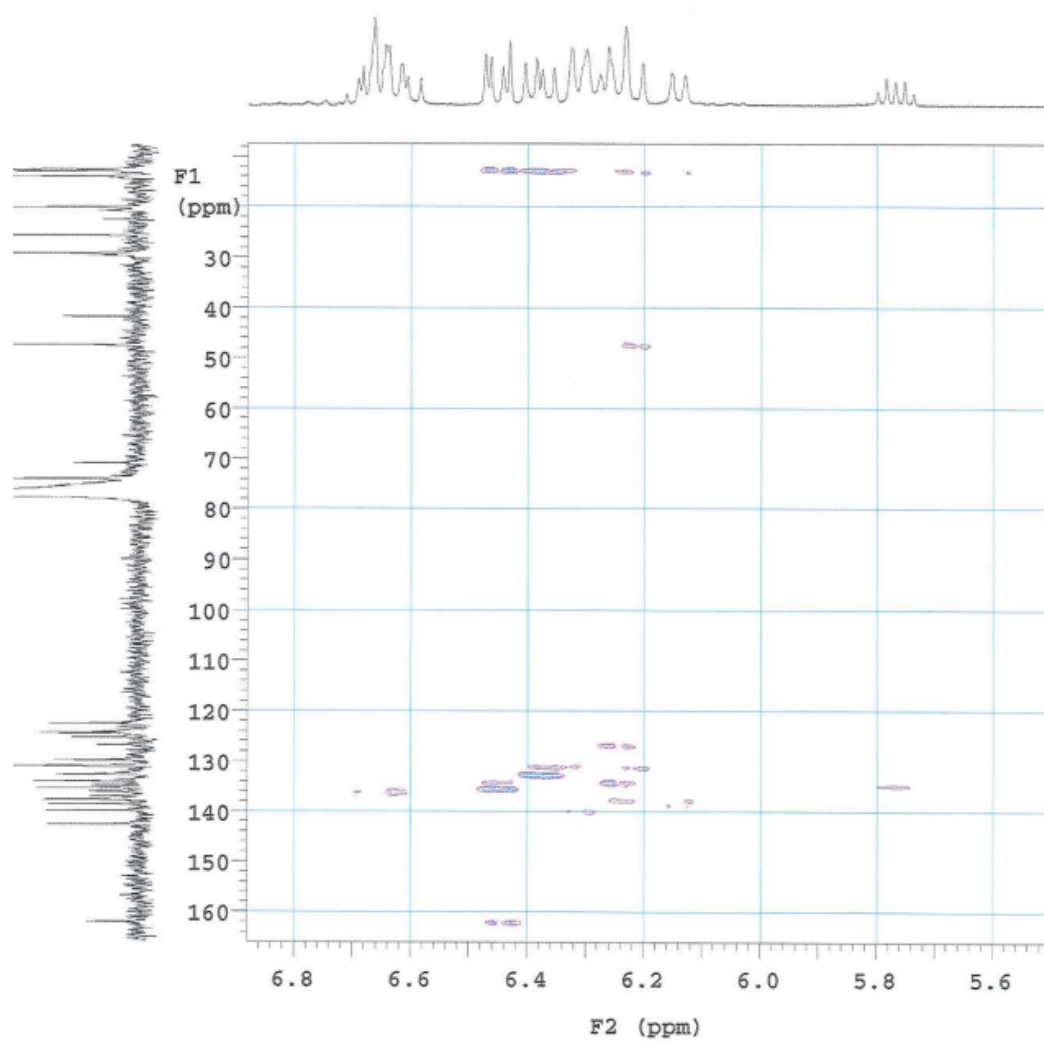

**Fig. S16** Enlarged view 2 of HMBC spectrum in Figure S14

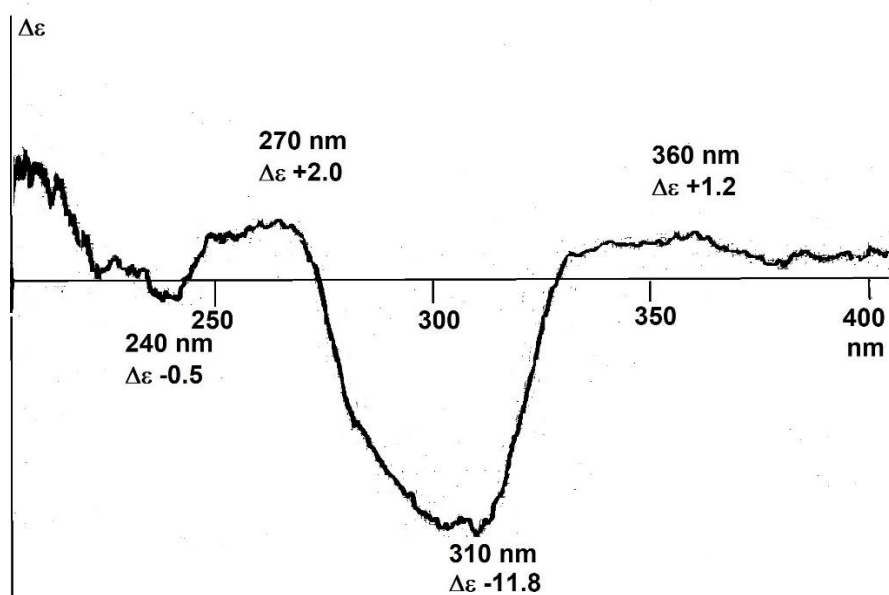

**Fig. S17** CD spectrum of Purified peak III

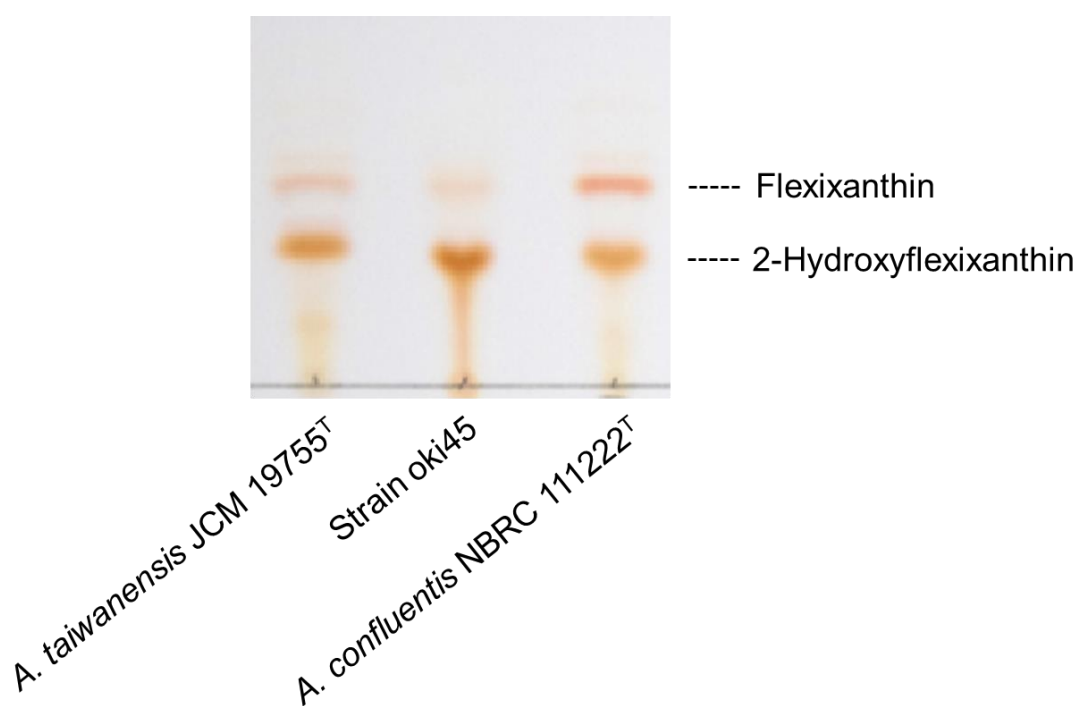

**Fig. S18** TLC analysis of *Algoriphagus confluentis* NBRC 111222<sup>T</sup> and *Algoriphagus taiwanensis* JCM 19755<sup>T</sup>

Total lipids of three strains were extracted by Folch method and performed by n-hexane/acetone (60:40, v/v) on TLC plate with silica gel 60.

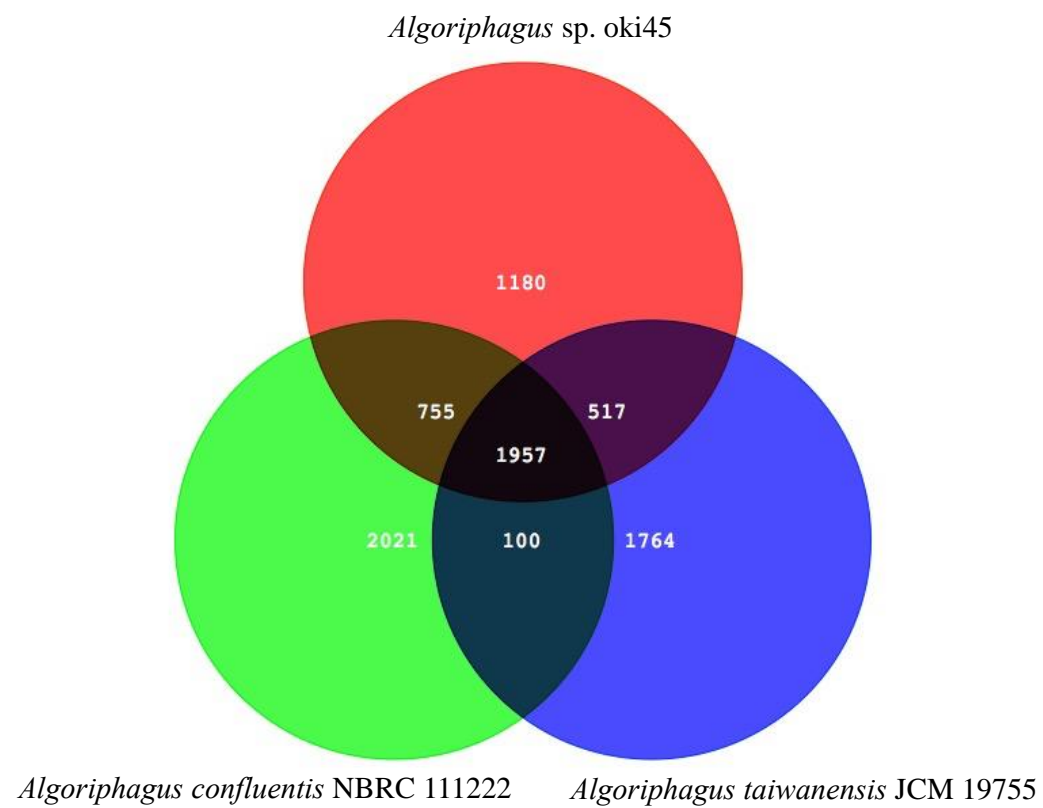

**Fig. S19** Venn-Diagram comparing the genomic content of three *Algoriphagus*

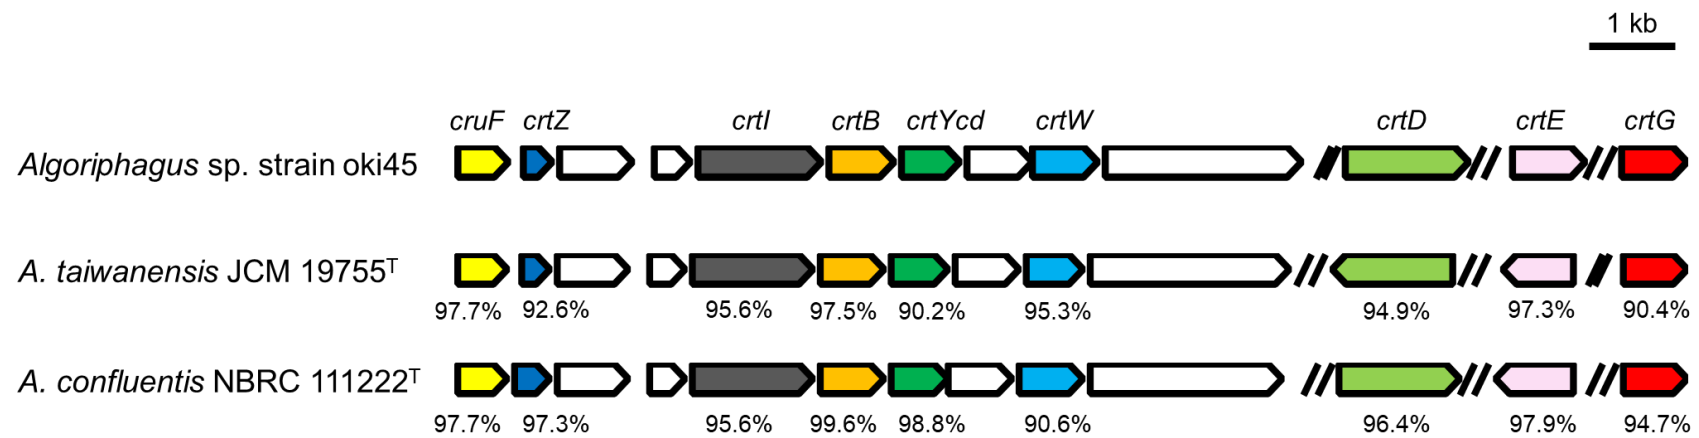

**Fig. S20** Putative carotenoid biosynthetic genes in strain oki45, *A. confluentis* NBRC 111222<sup>T</sup>, *A. taiwanensis* JCM 19755<sup>T</sup>

Yellow, *cruF*; Blue, *crtZ*; Gray, *crtI*; Orange, *crtB*; Green, *crtYcd*; Light blue, *crtW*; Light green, *crtD*; Pink, *crtE*; Red, *crtG*.

Percentages in the figure indicate amino acid identity to that of the strain oki45.

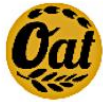

Heatmap generated with OrthoANI values  
calculated from the OAT software.  
Please cite Lee et al. (submitted)

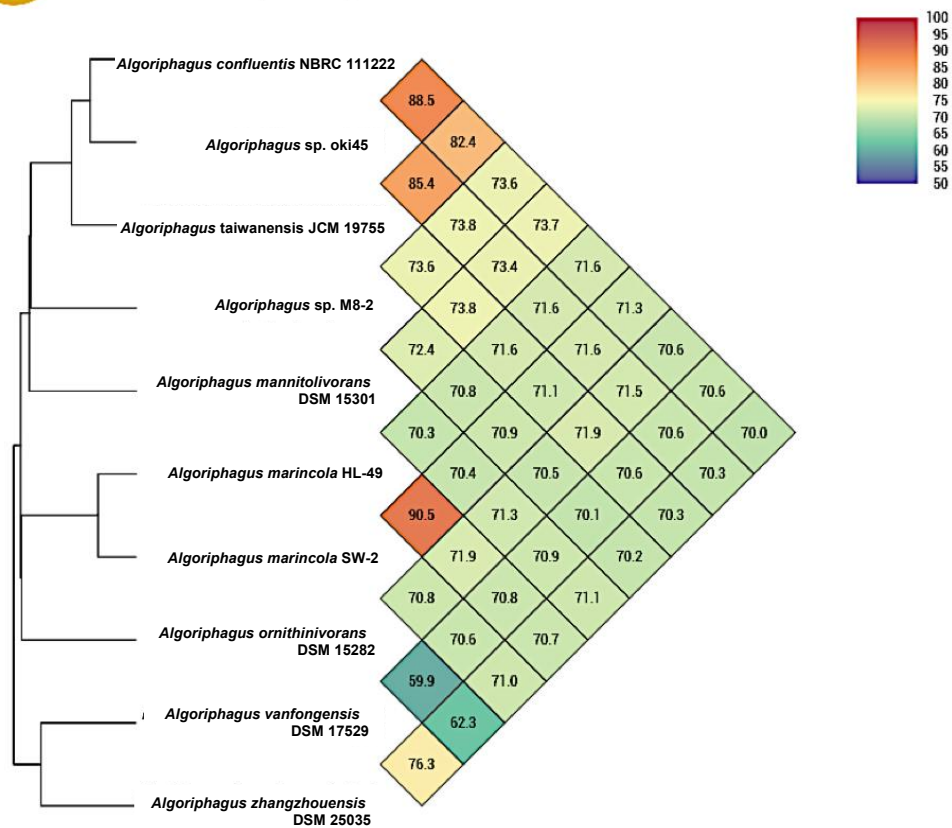

**Fig. S21** Comparison of ANI between 10 *Algoriphagus*



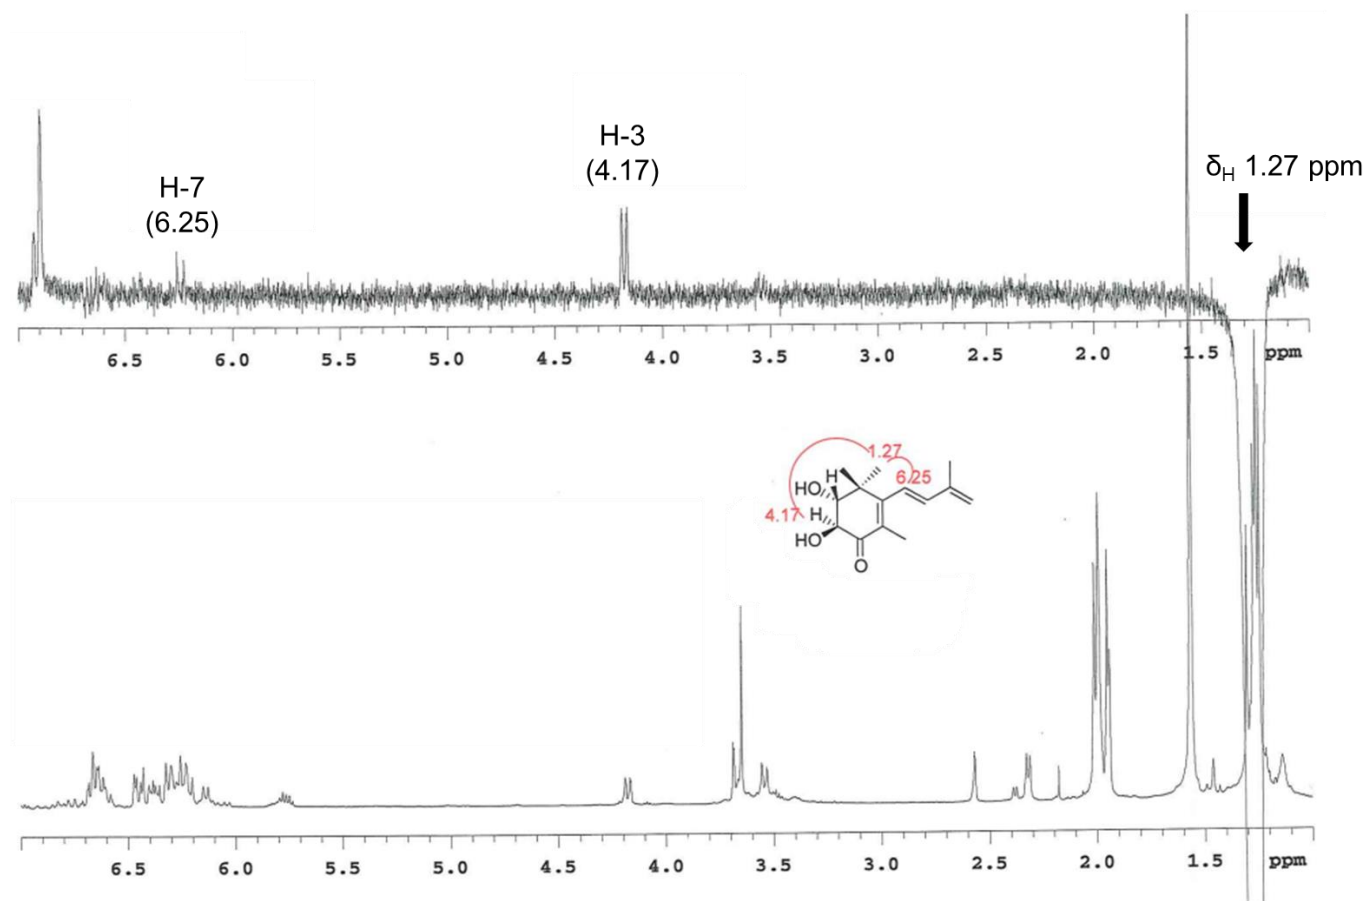

**Fig. S22** 1D NOE spectrum of purified Peak III (1)

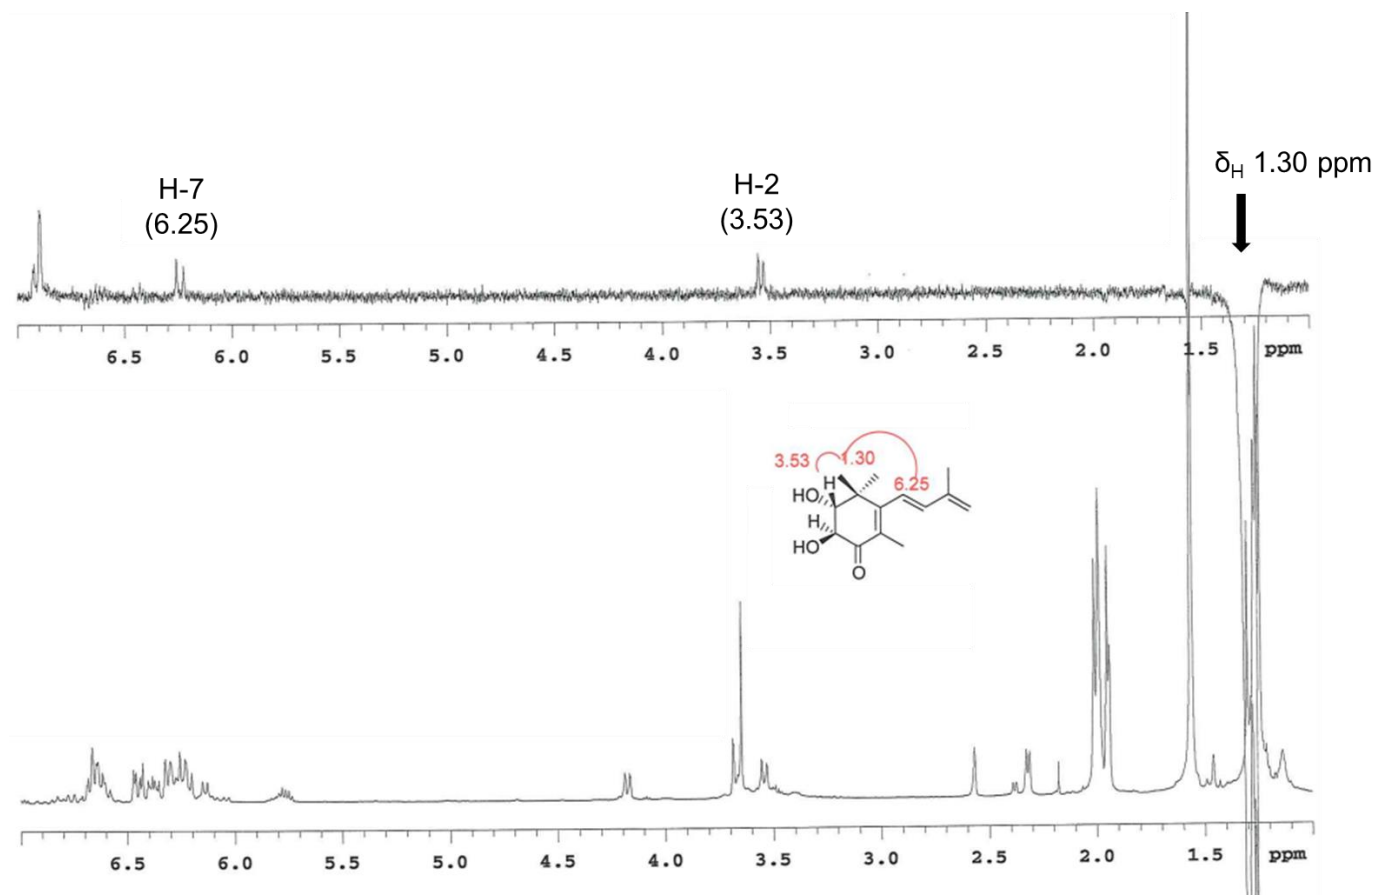

**Fig. S23** 1D NOE spectrum of purified Peak III (2)

**Table S1** Calculation results using GGDC for three strains of oki45, *A. confluentis* NBRC 111222<sup>T</sup>, *A. taiwanensis* JCM 19755<sup>T</sup>

| Query genome                    | Reference genome                | DDH  | Model confidence intervals | Distance | Probability that DDH >= 70% | G+C difference |
|---------------------------------|---------------------------------|------|----------------------------|----------|-----------------------------|----------------|
| <i>Algoriphagus</i> sp. oki45   | <i>Algoriphagus confluentis</i> | 35.7 | [33.3 - 38.3%]             | 0.1151   | 0.83                        | 0.24           |
| <i>Algoriphagus</i> sp. oki45   | <i>Algoriphagus taiwanensis</i> | 29.5 | [27.2 - 32%]               | 0.1447   | 0.09                        | 0.1            |
| <i>Algoriphagus confluentis</i> | <i>Algoriphagus taiwanensis</i> | 25.2 | [22.9 - 27.7%]             | 0.1725   | 0.01                        | 0.14           |
